# Supplementary material
Source: Springer Nature journal article supplement (https://www.springermedizin.de/resource/supplementary/12974_2010_357_MOESM5_ESM.pdf/9601482)

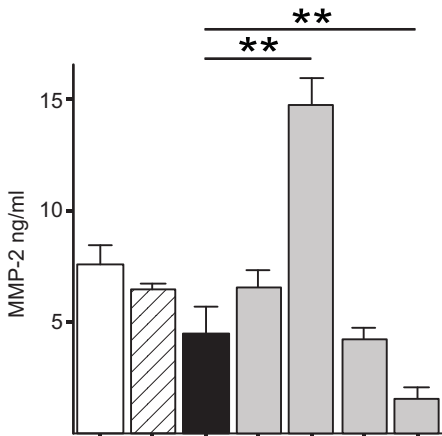

|                  |   |   |   |   |    |   |    |
|------------------|---|---|---|---|----|---|----|
| CoMCont          | - | + | - | - | -  | - | -  |
| CoMTb            | - | - | + | + | +  | + | +  |
| SB203580 $\mu$ M | - | - | - | 1 | 10 | - | -  |
| PD98059 $\mu$ M  | - | - | - | - | -  | 1 | 10 |

MMP-2  $\blacktriangleright$

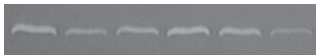

Supplement: MOESM5 [file 9601482]
